1 Title: Factors associated with decreased anal sphincter tone and the accuracy of forced anal examinations  
2 to detect individuals having receptive anal intercourse: An observational study

3  
4 Authors: Alan G Nyitray, PhD,<sup>1,2</sup> B R Simon Rosser, PhD,<sup>3</sup> Aniruddha Hazra, MD,<sup>4</sup> Jenna Nitkowski,  
5 PhD,<sup>2</sup> Derek Smith, APN,<sup>5</sup> Bridgett Brzezinski, MA,<sup>2</sup> Timothy J Ridolfi,<sup>6</sup> MD, John A Schneider, MD,  
6 MPH,<sup>4</sup> Elizabeth Y Chiao, MD,<sup>7</sup> Sandrine Sanos, PhD,<sup>8</sup> Ever Mkonyi, PhD,<sup>9</sup> Lucy R Mgopa, MD,<sup>10</sup>  
7 Michael W Ross, PhD<sup>11</sup>

8  
9 Affiliations

10 <sup>1</sup> Clinical Cancer Center, Medical College of Wisconsin, Milwaukee, Wisconsin, USA

11 <sup>2</sup> Center for AIDS Intervention Research, Medical College of Wisconsin, Milwaukee, Wisconsin, USA

12 <sup>3</sup> School of Public Health, University of Minnesota, Minneapolis, Minnesota, USA

13 <sup>4</sup> University of Chicago, Section of Infectious Diseases and Global Health, Chicago, USA

14 <sup>5</sup> The Crofoot Research Center, Houston, Texas, USA

15 <sup>6</sup> Department of Surgery, Medical College of Wisconsin, Milwaukee, Wisconsin, USA

16 <sup>7</sup> MD Anderson Cancer Center, Houston, Texas, USA

17 <sup>8</sup> Les plumes rouges, San Antonio, Texas, USA

18 <sup>9</sup> Medical Education Research and Evaluation Office, Case Western Reserve University, Cleveland, Ohio,  
19 USA

20 <sup>10</sup> Department of Psychiatry and Mental Health, Muhimbili University of Health and Allied Sciences, Dar  
21 es Salaam, Tanzania

22 <sup>11</sup> Institute for Sexual and Gender Health, Department of Family Medicine, University of Minnesota  
23 Medical School, Minneapolis, Minnesota, USA

24  
25 Corresponding author:

26 Dr Alan G Nyitray

27 Clinical Cancer Center and Center for AIDS Intervention Research

28 Medical College of Wisconsin

29 2071 North Summit Avenue

30 Milwaukee, WI 53202

31 Email: [anyitray@mcw.edu](mailto:anyitray@mcw.edu)

32 Ph: 414-955-7701

33 Fax: 414-287-4209

34

35 Structured summary 299/300 words; body 3414/3500 words; references 30/30

36

37 **Abstract**

38 **Objective and Design** Forced anal examinations are used to prosecute sexual and gender minorities  
39 (SGM) in at least seven countries under the presumption that decreased sphincter tone, estimated by a  
40 finger inserted into the anal canal, can detect persons practicing receptive anal intercourse. In a cross-  
41 sectional analysis of the baseline data from a longitudinal study, we aimed to determine factors associated  
42 with sphincter tone and the accuracy of sphincter tonality to detect persons engaging in receptive anal  
43 intercourse.

44

45 **Setting** Clinicians in Chicago, Houston, and Milwaukee, USA conducted digital anal rectal examinations  
46 (DARE) on 838 participants, 94.0% of whom were cisgendered males. Clinicians used the Digital Rectal  
47 Examination Scoring System to score sphincter resting tone (RT) and squeeze tone (ST). On a separate  
48 survey, individuals reported their preferred position for anal intercourse: i.e., either always/mostly  
49 insertive anal intercourse, always/mostly receptive anal intercourse, or both receptive and insertive anal  
50 intercourse. Multivariable regression assessed factors associated with decreased sphincter tone while area  
51 under the Receiver Operating Characteristic curves (AUC) estimated the accuracy of sphincter tonality to  
52 detect receptive anal intercourse.

53

54 **Results** 11.3% had decreased RT (95/838) and 6.3% had decreased ST (53/838). The accuracy of DARE  
55 to detect any receptive anal intercourse was little better than random guessing (AUC 0.53, 95% CI 0.51 to  
56 0.55, and AUC 0.51, 95% CI 0.49 to 0.53, respectively. RT and ST decreased with age regardless of  
57 sexual behavior ( $p_{\text{trend}} < 0.01$  for both). Compared to individuals having always/mostly insertive anal  
58 intercourse, individuals having always/mostly receptive anal intercourse was associated with decreased  
59 RT, but not ST, while those equally preferring both insertive and receptive anal intercourse were not  
60 associated with decreased RT or ST.

61

62 **Conclusions** Decreased sphincter tone is uncommon among SGM who prefer receptive anal intercourse.

63 Given virtually no accuracy, a finger inserted into the anus has no utility to detect individuals practicing

64 receptive anal intercourse and thus should not be used as such.

65

66 **Trial registration** NCT04090060

67

68 **Keywords**

69 Sexual and gender minorities, anal sphincter, receptive anal intercourse, digital anal rectal examination

70

71

## **Summary Box**

### **What is already known on this topic**

To gather evidence for prosecution of sexual and gender minorities, forced anal exams are used in multiple countries. The examination includes inserting the index finger into the anal canal to detect decreased sphincter tone which is considered evidence of receptive anal intercourse. We found only two small studies (n= 58 and n=24) assessing factors associated with decreased sphincter tone and none assessing the accuracy of sphincter tone to detect sexual and gender minorities having receptive anal intercourse.

### **What this study adds**

Our study suggests that a finger inserted into the anal canal is not useful to detect a history of receptive anal intercourse. As such, the sexual practices of individuals cannot be known using a forced anal examination.

## 72 **Introduction**

73 Forced anal examinations are used in at least seven countries to support prosecuting individuals suspected  
74 of being sexual minorities, gender minorities, or both.<sup>1 2</sup> The exam involves viewing the anus and then  
75 inserting a finger into the anal canal to assess sphincter tone. It is not related to clinical care.<sup>3</sup> Reduced  
76 sphincter tone has been used in these countries as evidence that the individual engages in receptive anal  
77 intercourse (RAI) and thus is a sexual and/or gender minority. The forced anal exam result is used to  
78 support conviction of individuals for same-sex conduct, which can result in imprisonment and, in some  
79 cases, execution.<sup>2</sup>

80  
81 Health care providers often perform the forced anal exam under the direction of police<sup>2</sup> and point to a 19<sup>th</sup>  
82 century text by French forensic pathologist Ambroise Tardieu, “Étude Médico-légale sur les attentats aux  
83 moeurs”<sup>4</sup> to justify the use of the procedure.<sup>2</sup> Tardieu’s influential studies were part of a larger medical  
84 literature interested in categorizing sexual types, especially male homosexuality or “pederasty,” which he  
85 associated with prostitution and crime,<sup>5 6</sup> shaping judicial response and policing of those deemed “sexual  
86 deviants” or “inverts”.<sup>6 7</sup> He argued that medical expertise could “locate [anatomical] evidence of  
87 pederasty” and, thus, identify those who must be prosecuted.<sup>6</sup> He identified two types and claimed that, in  
88 the case of “passive pederasts”, “loose anuses,” as judged by an index finger inserted into the anal canal,  
89 indicated the individual had a history of RAI.<sup>6 8</sup> Tardieu also claimed that anuses of homosexual men  
90 became funnel shaped because of RAI.<sup>4</sup> To our knowledge, there are no data to support Tardieu’s claims,  
91 especially the proposition that insertion of a finger into the anal canal is an accurate test of an individual  
92 engaging in RAI.

93  
94 Sphincter resting tone (RT) is controlled by the internal sphincter muscle, an involuntary smooth muscle,  
95 and sphincter squeeze tone (ST) is controlled by the external sphincter muscle, a voluntary striated  
96 muscle.<sup>9 10</sup> Data on factors associated with RT and ST among sexual and gender minorities (SGM) come  
97 from two studies with sample sizes  $\leq 58$  individuals.<sup>11 12</sup> Sphincter tone among a large sample of SGM

98 has not been reported to our knowledge. As part of two anal cancer screening studies among SGM that  
99 included digital anal rectal examinations (DARE) conducted by trained health care providers, we  
100 collected data on RT, ST, and sexual behavior. A DARE is a clinical procedure that includes inserting a  
101 finger into the anus to detect abnormalities and is recommended for anal cancer screening.<sup>13</sup> As part of  
102 DARE, health care providers also note sphincter tone. Thus, the mechanics of the DARE clinical  
103 procedure correspond with the mechanics of the non-clinical forced anal examination. Our objective was  
104 to assess clinical and behavioral factors associated with decreased RT and ST among SGM and to  
105 estimate the accuracy of a DARE measurement of sphincter tone to detect persons who have RAI.

106

## 107 **Methods**

### 108 Data sources

109 Data for the current analyses come from two longitudinal studies assessing anal cancer screening  
110 protocols, the Prevent Anal Cancer (PAC) Self-Swab Study (R01CA215403, AGN) conducted in  
111 Milwaukee, USA<sup>14</sup> and the PAC Palpation Study (R01CA232892, AGN) conducted in Chicago and  
112 Houston, USA.<sup>15</sup> The studies were conducted 2020-2023. Given a common goal of anal cancer prevention  
113 and a common study population, protocols for the PAC studies were synchronized regarding recruitment,  
114 consenting procedures, clinical protocols and forms, survey procedures, and, as appropriate, survey items.  
115 All PAC studies' procedures were approved by the Medical College of Wisconsin Human Protections  
116 Committee (PRO32999 and PRO33000). All participants in this article provided written informed  
117 consent.

118

### 119 Patient and Public Involvement

120 Before study activities began, the PAC parent studies convened Community Advisory Boards to support  
121 participant recruitment, study activities, and data interpretation. Results from the current study have been  
122 presented to these boards.

123

124 Participants

125 Individuals were eligible to join either study if they were aged  $\geq 25$  years and acknowledged sex with  
126 men in the past five years or identified with a minority sexual orientation or as a transgender person who  
127 has sex with men. Persons in Milwaukee were excluded if they used anticoagulants other than NSAIDs or  
128 had a prior diagnosis of anal cancer. Individuals in Chicago and Houston were excluded if they had a  
129 DARE in the prior three months, or were being treated for condyloma, hemorrhoids or anal cancer.

130

131 Study activity and data collection

132 Interested persons took an online eligibility survey before being consented online. Once written consent  
133 was provided, participants took the baseline survey which had questions about sexual behavior including  
134 their preferred position during anal intercourse: “In your lifetime, have you mostly engaged in insertive  
135 anal sex, receptive anal sex, or both?” Response options were “Always or mostly engaged in insertive  
136 anal sex (your penis in his [or their] anus),” “Always or mostly engaged in receptive anal sex (his [or  
137 their] penis in your anus)” “More or less equally engaged in insertive and receptive anal sex (I have been  
138 versatile),” or “I’ve never engaged in anal sex.” Additional items asked about sexual behavior including  
139 frequency of anal intercourse and when the last anal intercourse occurred. Other items asked participants  
140 about their clinical history, including diagnoses of obesity or diabetes.

141

142 After completing the baseline survey, all individuals were asked to attend a clinic visit that included a  
143 DARE conducted by a clinician including physicians, advanced practice nurses (APN), and registered  
144 nurses. In Chicago, the clinic appointment primarily occurred at a drop-in center serving SGM. In  
145 Houston and Milwaukee, clinic appointments primarily occurred at SGM or HIV clinics. Each clinician  
146 was trained to conduct the DARE according to International Anal Neoplasia Society Guidelines and to  
147 record all perianal and anal canal abnormalities.<sup>13</sup> DARE includes viewing and palpating the perianus and  
148 anal os, and then palpating the anal canal for abnormalities. As part of palpating the anal canal, sphincter  
149 tone was noted using the Digital Rectal Examination Scoring System’s (DRESS) 6-point scale for RT, 0 =



150 “no discernible tone at rest,” 1 = “very low tone,” 2 = “mildly decreased tone,” 3 = “normal,” 4 =  
151 “elevated tone, snug” and 5 = “very high tone, a tight anal canal, difficult to insert finger” and ST, 0 = “no  
152 discernible increase in tone with squeezing effort,” 1 = “slight increase,” 2 = “fair increase but below  
153 normal,” 3 = “normal,” 4 = “strong squeeze” and 5 = “very strong squeeze, to the point of being painful to  
154 the examiner.”<sup>16</sup> Clinicians did not know participants’ preferred position for anal intercourse before  
155 recording sphincter tone.

156

157 Statistical analysis

158 RT was dichotomized: scores of 0-2 were defined as decreased resting tone, while scores of 3-5 were  
159 labeled as normal or increased resting tone. ST was similarly dichotomized with 0-2 defined as decreased  
160 squeeze tone and scores of 3-5 defined as normal or increased squeeze tone. For the variable preferred  
161 position for anal intercourse, the value of “never engaged in anal sex” was combined with “always or  
162 mostly engaged in insertive anal sex” (IAI).

163

164 For assessment of accuracy, individuals who mostly/always preferred RAI were combined with those who  
165 practiced RAI and IAI about equally, i.e., versatile, to construct a variable with two categories: 1) IAI and  
166 2) those who practiced any RAI. The accuracy of decreased sphincter tone to detect preferred position for  
167 anal intercourse was assessed with 95% confidence intervals (CI) and stratified by clinician type.

168

169 Bivariate analyses for RT and ST were stratified by tonality (either decreased tone or normal/increased  
170 tone), and included assessment of their association with age, sex at birth, gender identity, race, ethnicity,  
171 sexual orientation, years of school, sexual behavior, HIV status, self-reported comorbidities (i.e., arthritis,  
172 carpal tunnel syndrome, cerebral palsy, diabetes, fibromyalgia, chronic lower back pain, motor neuron  
173 diseases, movement disorders, multiple sclerosis, obesity, spina bifida, spinal cord injury, or stroke),  
174 current anxiety and depression, clinician type, and clinical findings from DARE, BMI, and waist size.

175

176 We constructed a multivariable model to regress RT and ST on preferred position for anal intercourse and  
177 other factors after adjustment by confounders. We used purposeful modeling strategies in addition to  
178 Directed Acyclic Graphs to support identification of confounders for inclusion and intermediate variables  
179 for exclusion.<sup>17 18</sup> Firth bias correction was used in all regression models to reduce bias associated with  
180 cells with no data.<sup>19</sup> Age, race and ethnicity, HIV status and assigned sex at birth were considered  
181 potential confounders while last RAI was an intermediate variable between preferred position for anal  
182 intercourse and sphincter tone and thus was excluded from multivariable modeling. Exposures with a  
183 likelihood ratio test p-value of less than 0.15 in bivariate analysis were included in logistic regression  
184 models and then were manually removed one at a time using backwards elimination if their p-value was >  
185 0.05. Associations in the multivariable model were considered significant when a p-value was  $\leq 0.05$ .  
186 Adjusted and unadjusted odds ratios were reported with 95% CIs. Study size was determined by power  
187 analyses for the primary questions in the longitudinal anal cancer studies. The current analysis did not  
188 have a separate power assessment.

189  
190 Since accuracy of DARE may be related to medical training and the number of DAREs performed,<sup>13</sup>  
191 supplementary analyses were conducted after restricting the dataset to physicians and APNs who  
192 performed > 50 DAREs in the study. Due to a limited number of outcomes, multivariable analysis for  
193 factors associated with sphincter ST could not be completed in this restricted dataset. Initial analyses were  
194 conducted using SAS 9.4 TS Level 1M6 (SAS Institute, Cary, North Carolina, USA) and duplicate  
195 analyses were conducted using Stata/BE 18.0 (StataCorp LLC, College Station, TX, USA) and SPSS 28.0  
196 (Armonk, NY, USA).

197

## 198 **Results**

199 A total of 1207 individuals in Chicago, Houston, and Milwaukee were eligible and gave consent to  
200 participate. Of these, 1088 completed the baseline survey including questions about their clinical history  
201 and preferred position for anal intercourse. A total of 841 individuals then attended one of nine clinics to

202 receive a DARE and assessment of sphincter tone from a trained clinician. Three DAREs were judged as  
203 inadequate by the clinician leaving 838 individuals in the primary analysis. For supplementary analysis,  
204 i.e., restricting inclusion to individuals whose clinicians conducted > 50 DAREs in the study, 609  
205 individuals were included in analyses.

206  
207 Median age was 41 years (range, 25-80 years) and approximately one-half (52.5%) identified as non-  
208 Hispanic (NH) white, 20.9% as NH Black, and 21.1% as Hispanic (Table 1). A total of 85.3% identified  
209 as gay, and 43.5% had > 16 years of school. A total of 33.9% and 14.6% of participants self-reported a  
210 prior diagnosis of HIV and obesity, respectively. Individuals who reported IAI comprised 23.6% of the  
211 sample (n=198), 41.7% (n=349) reported preferring both receptive and insertive anal intercourse about  
212 equally, and 34.7% (n=291) reported RAI. Medical doctors, APNs, and registered nurses performed  
213 DARE on 39.5%, 52.7%, and 7.8% of participants, respectively. Clinicians noted no abnormally-shaped  
214 anuses.

215  
216 Sphincter resting tone  
217 Clinicians identified 95 (11.3%) individuals with decreased RT and 743 (90.3%) with normal or increased  
218 RT (Table 1). On the 0-5 DRESS scale, the mean RT was 2.97 (SD, 0.49) (Table 1). The mean RT among  
219 IAI, versatile, and RAI individuals was 3.10 (SD, 0.54), 2.95 (SD, 0.47), and 2.91 (0.47), respectively (p  
220 < 0.001; data not shown).

221  
222 The median age of persons with decreased RT was 56 years while the age of persons with normal or  
223 increased RT was 39 years (p<0.001) (Table 1). Regardless of preferred position for anal intercourse,  
224 increased age was associated with decreased RT (Figure).

225  
226 Individuals with decreased RT also reported obesity almost twice as often as those with normal or  
227 increased tone (p=0.002) (Table 1). A higher proportion of people with HIV had decreased RT compared

228 with HIV-negative persons (18.9% and 7.7%, respectively,  $p < 0.001$ ) and individuals reporting a  
229 diagnosis of diabetes or arthritis also had decreased RT ( $p < 0.001$ , Table 1).

230  
231 In univariate analysis (Table 2), increasing age, BMI, and waist size were associated with decreased RT.  
232 Assigned sex at birth, gender identity, marital status, HIV status, diabetes, obesity, arthritis, stroke,  
233 preferred position for anal intercourse, frequency of any anal intercourse, and clinician type were also  
234 associated with RT. For example, reporting a prior diagnosis of obesity was associated with decreased RT  
235 (OR 2.25, 95% CI 1.35-3.73, compared to those not reporting obesity). Individuals preferring RAI were  
236 associated with decreased RT (OR 2.11, 95% CI 1.12-2.95 compared to individuals preferring IAI).

237  
238 In multivariable analysis for decreasing RT, age, gender identity, race, HIV status, obesity, and clinician  
239 type were significant while preferred position for anal intercourse was also associated with RT after  
240 adjusting for confounders (aOR 2.82, 95% CI 1.37-5.82 for persons who performed RAI compared to  
241 those performing IAI) (Table 2). Engaging equally in RAI and IAI was not associated with decreased RT.

242  
243 In supplementary analysis with clinicians completing DAREs with  $> 50$  individuals in the study, a total of  
244 609 individuals were analyzed (Supplementary Table 1) with the prevalence of decreased RT being 7.4%.

245 In multivariable analysis in this restricted dataset, factors associated with decreased RT were similar to  
246 the full dataset: increasing age, obesity, preferring always/mostly RAI (compared to IAI), and an APN  
247 clinician type (compared to physician); however, gender identity and race/ethnicity were no longer  
248 associated with decreased RT.

249  
250 Sphincter squeeze tone

251 Clinicians detected 6.3% ( $n=53$ ) of individuals with decreased ST (Table 1). On the 0-5 DRESS scale, the  
252 mean ST was 3.04 (SD, 0.48). By preferred position for anal intercourse, the mean DRESS scale score

253 was 3.10 (SD, 0.55), 3.02 (SD, 0.45), and 3.01 (SD, 0.44) among individuals preferring IAI, being  
254 versatile, and RAI, respectively ( $p = 0.12$ ) (data not shown).

255

256 As with RT, the median age of persons with decreased ST was higher than those with normal/increased  
257 tone, 55 and 40 years, respectively ( $p < 0.001$ , Table 1). Increasing age was associated with decreased ST  
258 regardless of preferred position for anal intercourse ( $p < 0.01$ , figure). Unlike with RT, there was no  
259 difference in ST by HIV status ( $p < 0.001$  and  $p = 0.99$ , respectively). Also unlike RT, there was little  
260 difference in ST among people with and without a self-reported diagnosis of obesity ( $p = 0.002$  and  
261  $p = 0.61$ ).

262

263 In univariate logistic regression analysis for ST (Table 2), significant associations between factors and ST  
264 were generally similar to associations between factors and RT, for example, age, waist size, assigned sex  
265 at birth, diabetes, arthritis, frequency of anal intercourse and clinician type. Unlike with RT, BMI, gender  
266 identity, marital status, HIV status, obesity, stroke, and preferred position for anal sex were not associated  
267 with ST while race/ethnicity and condyloma detected at the clinic visit were associated with ST.

268

269 In multivariable analysis (Table 2), decreased ST was associated with increasing age, being assigned  
270 female sex at birth (compared to being assigned male), marital status, a condyloma diagnosis at the clinic  
271 visit, and clinician type of registered nurse (compared with physician) after adjusting for other variables,  
272 including confounders, in the model. Being married, compared to single with no steady partner(s), was  
273 protective of decreased ST. Individuals preferring RAI or being versatile were not significantly associated  
274 with decreased ST.

275

276 Accuracy

277 The AUC of a DARE assessment of RT to detect individuals having any RAI was 0.53 (95% CI 0.51-  
278 0.55) (Table 3). The accuracy of a DARE assessment of ST to detect individuals having any RAI was  
279 0.51 (95% CI 0.49-0.53).

280  
281 In supplementary analyses with only physicians and APNs, the accuracy of a DARE assessment of RT to  
282 detect individuals having any RAI was 0.09 (95% CI 0.07-0.12) (Supplementary Table 3). The accuracy  
283 of a DARE assessment of ST to detect individuals having any RAI was 0.03 (95% CI 0.02-0.05).

284

## 285 **Discussion**

286 We report data that rejects the utility of the forced anal exam to detect persons having receptive anal  
287 intercourse. In this sample of 838 individuals who were sexual minorities, gender minorities, or both,  
288 decreased anal sphincter resting tone was uncommon (11.3%) with 88.7% of individuals having normal or  
289 increased RT based on a DARE DRESS score. For squeeze tone, 93.7% of SGM had normal or increased  
290 ST. The accuracy of a DARE assessment of RT and ST to detect individuals having any RAI was only  
291 0.53 and 0.51, respectively. Since an AUC value of 0.50 means a test is no better than flipping a coin, the  
292 accuracy of sphincter tonality to detect receptive anal intercourse is virtually nil. A limitation of this  
293 finding is that sphincter tone may differ for individuals experiencing forced vs. voluntary examinations. If  
294 forced exams result in tensing or sphincter contraction individuals, regardless of preferred position for  
295 anal sex, we would expect accuracy of the exam to decrease.

296  
297 Decreased anal sphincter RT and ST was strongly associated with age in all categories of preferred  
298 position for anal intercourse. With each year of age, there was a 9% increased risk of having decreased  
299 RT. Age-associated decreased sphincter tone has ample support in the literature.<sup>20-22</sup> Age-related fibrotic  
300 processes likely affect both smooth<sup>23</sup> and striated<sup>10</sup> muscles, reducing muscle content and enhancing  
301 atrophy;<sup>9,24</sup> thus, in this sample, age-related exposures, i.e., diabetes, arthritis, and stroke, were associated  
302 with decreased tonality in univariate analysis but not after adjusting for age.

303

304 Large studies have assessed sphincter tone with manometry,<sup>20 25 26</sup> a device to measure sphincter pressure,  
305 but none assessed sphincter tone among SGM. Two small studies<sup>11 12</sup> have used manometry to assess the  
306 association between sphincter tone and RAI. Miles et al.<sup>11</sup> compared 40 gay males having RAI (23 of  
307 whom had HIV) with 18 age-matched heterosexual males who did not acknowledge RAI. Chun et al.<sup>12</sup>  
308 enrolled 14 HIV-negative gay males having RAI and ten age-matched male controls not acknowledging  
309 RAI. Both studies observed lower RT among the gay males than the controls, while ST did not differ  
310 between the two groups. These results are consistent with our observations. Chun et al. suggested that  
311 lower RT pressures during manometry may occur if the internal sphincter muscle of those preferring RAI  
312 is better able to relax during anal canal manometry compared to those acknowledging only IAI.

313

314 While these data indicate that SGM seldom have decreased sphincter tone (only 14.1% of those preferring  
315 RAI had decreased RT), they also suggest an association with decreased resting tone for those  
316 always/mostly having RAI but no significant association with those having *any* RAI, i.e., those preferring  
317 RAI and those equally preferring both RAI and IAI. The strongest influence on tone was age, regardless  
318 of preferred position for anal intercourse. Note that for those preferring RAI, age-related decreased  
319 sphincter tone may result in decreased anodyspareunia.<sup>27 28</sup>

320

321 In general, factors associated with decreased RT and ST were similar with notable exceptions including  
322 those always/mostly preferring RAI. Perhaps individuals preferring RAI were better able to relax the  
323 external sphincter muscle during the DARE than individuals preferring IAI. Individuals with HIV were  
324 also associated with decreased RT but not ST which may be related to HIV-induced accelerated aging and  
325 damage to smooth muscle cells caused by HIV and anti-retroviral treatment.<sup>29</sup>

326

327 Those with decreased RT and ST had increased odds of receiving a DARE from an APN or registered  
328 nurse compared to a physician. These results were consistent with the restricted data set which used

329 observations from clinicians conducting >50 DAREs in the study. In Houston, where APNs completed all  
330 DAREs, participants were substantially older and more likely to have HIV compared to Chicago  
331 participants where most DAREs were conducted by a physician; thus, residual age- or HIV-related  
332 confounding may explain differences in sphincter tone by clinician type. Alternatively, differences in tone  
333 assessment might occur if physicians receive more digital rectal examination training or practice in school  
334 than APNs or registered nurses.

335  
336 To our knowledge, the association between obesity and sphincter resting tone has not been assessed.  
337 Obesity is associated with chronic inflammation<sup>30</sup> which may induce fibrotic processes, in turn,  
338 promoting internal sphincter atrophy.<sup>20</sup>

339  
340 The combined category of transgender, woman, and other had decreased resting sphincter tone although  
341 data were sparse. Just over one-quarter (27.6%), reported a female assignment at birth. Lower RT in  
342 females than males may be due to parity and increased muscle mass in males.<sup>20-22</sup>

343  
344 *Limitations*

345 Practical limitations in this large study required using the DRESS scale as a proxy for manometry. While  
346 the DRESS scale is strongly correlated with manometry pressures (Spearman rank correlation, 0.82 for  
347 RT and 0.81 for ST),<sup>16</sup> it may introduce more error in sphincter tone outcome scores. Nonetheless,  
348 previous manometry findings associating decreased sphincter tone with age, sex at birth, and RAI are  
349 consistent with the current study's findings. Two clinicians, a physician and APN, conducted 65% of  
350 DAREs which may increase reliability in resting and squeeze sphincter tone measurement. Self-reported  
351 lifetime preferred position for anal intercourse, disease history, and frequency of anal intercourse is  
352 subject to recall bias. No data were collected about douching, sex toys, or other anal manipulations which  
353 may limit our understanding of factors associated with sphincter tone. The sample was diverse regarding



354 age, race, ethnicity, and gender identity; however, it was also highly educated with 43.5% reporting > 16  
355 years of school.

356

357 In this study with 838 SGM, decreased sphincter resting tone and squeeze tone were rare. DARE had  
358 almost no accuracy to detect individuals having RAI; thus, the forced anal examination is useless in  
359 identifying SGM who prefer RAI, while also causing significant harm to individuals subjected to the  
360 test.<sup>1-3</sup> The proposition that a finger inserted into the anal canal can detect an individual engaging in RAI  
361 is false. Increased age was consistently associated with decreased sphincter resting tone and squeeze tone.

362

### 363 Author Contributions

364 AGN, SS, EYC, BRSR, and MWR conceptualized the analysis and developed the methodology. AH and  
365 DS conducted a majority of clinical examinations including DARE. AGN managed the data. AGN and  
366 JN conducted the formal analysis. AGN wrote the first draft of the manuscript. AGN, BRSR, AH, JN,  
367 DS, AP, BB, TJR, JAS, EYC, SS, EM, LRM, and MWR reviewed and edited manuscript drafts. The  
368 corresponding author attests that all listed authors meet authorship criteria and that no others meeting the  
369 criteria have been omitted.

370

371 *“The Corresponding Author has the right to grant on behalf of all authors and does grant on behalf of all*  
372 *authors, [a worldwide licence](#) to the Publishers and its licensees in perpetuity, in all forms, formats and*  
373 *media (whether known now or created in the future), to i) publish, reproduce, distribute, display and*  
374 *store the Contribution, ii) translate the Contribution into other languages, create adaptations, reprints,*  
375 *include within collections and create summaries, extracts and/or, abstracts of the Contribution, iii) create*  
376 *any other derivative work(s) based on the Contribution, iv) to exploit all subsidiary rights in the*

377 *Contribution, v) the inclusion of electronic links from the Contribution to third party material where-ever*  
378 *it may be located; and, vi) licence any third party to do any or all of the above."*

379

380 Acknowledgements

381 We thank the participants in the studies, the Prevent Anal Cancer (PAC) Self-Swab and Palpation Study  
382 Community Advisory Boards, the PAC Self-Swab and Palpation Study Teams, and Dr Jason S Farr.

383

384 Funding and Disclaimer

385 This research was supported by the National Cancer Institute of the National Institutes of Health under  
386 award numbers R01CA215403 and R01CA232892. The content is solely the responsibility of the authors  
387 and does not necessarily represent the official views of the National Institutes of Health. This work was  
388 also supported by the Medical College of Wisconsin. The study sponsors had no role in study design; in  
389 the collection, analysis, and interpretation of data; in the writing of the report; or in the decision to submit  
390 the paper for publication. The study authors had full access to the data and take responsibility for its  
391 integrity and accuracy.

392

393 Competing Interests

394 All authors have completed the ICMJE uniform disclosure form and declare: no support from any  
395 organisation for the submitted work except for AGN who received National Institutes of Health funding  
396 that was paid to his employing educational institution; no financial relationships with any organisations  
397 that might have an interest in the submitted work in the previous three years except for AGN, EYC, and  
398 MWR who received National Institutes of Health funding that was paid to their employing educational  
399 institutions; no other relationships or activities that could appear to have influenced the submitted work.

400

401 Transparency declaration

402 The lead author (AGN) affirms that the manuscript is an honest, accurate, and transparent account of the  
403 study being reported; that no important aspects of the study have been omitted; and that any discrepancies  
404 from the study as originally planned (and, if relevant, registered) have been explained.

405

406 Data sharing

407 Fully de-identified datasets and data dictionary will be shared with properly trained investigators  
408 requesting such on the study website (<https://mindyourbehind.org>) within one year of study completion  
409 after assessment of institutional policies, Medical College of Wisconsin Human Research Protections  
410 Program rules, as well as local, state, and federal and tribal laws and regulations. Further information is  
411 available from the corresponding author upon request.

| Characteristic                                       | Total<br>n=838 | Resting tone      |                           | p      | Squeeze tone      |                           | p      |
|------------------------------------------------------|----------------|-------------------|---------------------------|--------|-------------------|---------------------------|--------|
|                                                      |                | Decreased<br>n=95 | Normal/Increased<br>n=743 |        | Decreased<br>n=53 | Normal/Increased<br>n=785 |        |
| <b>Sphincter tone</b> , mean (SD)                    |                | 2.97 (0.49)       |                           |        | 3.04 (0.48)       |                           |        |
| <b>Age</b> , years * median (IQR)                    | 41 (32-54)     | 56 (49-62)        | 39 (32-52)                | <0.001 | 55 (47-60)        | 40 (32-53)                | <0.001 |
| <b>Body mass index</b> * median (IQR)                | 28 (25-32)     | 29 (25-35)        | 28 (25-31)                | 0.04   | 29 (24-33)        | 28 (25-32)                | 0.33   |
| <b>Waist size</b> , centimetres                      |                |                   |                           | <0.001 |                   |                           | 0.003  |
| ≤ 102                                                | 534 (64.3)     | 42 (44.2)         | 492 (66.9)                |        | 24 (45.3)         | 510 (65.6)                |        |
| > 102                                                | 297 (35.7)     | 53 (55.8)         | 244 (33.2)                |        | 29 (54.7)         | 268 (34.5)                |        |
| <b>Assigned sex at birth</b> †                       |                |                   |                           | 0.007  |                   |                           | 0.04   |
| Male                                                 | 826 (98.6)     | 90 (94.7)         | 736 (99.1)                |        | 50 (94.3)         | 776 (98.9)                |        |
| Female                                               | 12 (1.4)       | 5 (5.3)           | 7 (0.9)                   |        | 3 (5.7)           | 9 (1.2)                   |        |
| <b>Gender identity</b> †                             |                |                   |                           | 0.002  |                   |                           | 0.17   |
| Man                                                  | 787 (94.0)     | 86 (90.5)         | 701 (94.5)                |        | 48 (90.6)         | 739 (94.3)                |        |
| Transgender woman, transgender man, woman, and other | 29 (3.5)       | 9 (9.5)           | 20 (2.7)                  |        | 4 (7.6)           | 25 (3.2)                  |        |
| Non-binary                                           | 21 (2.5)       | 0                 | 21 (2.8)                  |        | 1 (1.9)           | 20 (2.6)                  |        |
| <b>Race and ethnicity</b>                            |                |                   |                           | 0.20   |                   |                           | 0.05   |
| White, non-Hispanic                                  | 437 (52.5)     | 56 (59.0)         | 381 (51.6)                |        | 36 (67.9)         | 401 (51.4)                |        |
| Black, non-Hispanic                                  | 174 (20.9)     | 18 (19.0)         | 156 (21.1)                |        | 10 (18.9)         | 164 (21.0)                |        |
| Hispanic                                             | 176 (21.1)     | 18 (19.0)         | 158 (21.4)                |        | 5 (9.4)           | 171 (21.9)                |        |
| Asian, non-Hispanic                                  | 30 (3.6)       | 0                 | 30 (4.1)                  |        | 0                 | 30 (3.9)                  |        |
| Other, non-Hispanic ‡                                | 16 (1.9)       | 3 (3.2)           | 13 (1.8)                  |        | 2 (3.8)           | 14 (1.8)                  |        |
| <b>Sexual orientation</b> †                          |                |                   |                           | 0.24   |                   |                           | 0.64   |
| Gay                                                  | 713 (85.3)     | 86 (90.5)         | 627 (84.6)                |        | 46 (86.8)         | 667 (85.2)                |        |
| Bisexual                                             | 73 (8.7)       | 4 (4.2)           | 69 (9.3)                  |        | 3 (5.7)           | 70 (8.9)                  |        |
| Queer                                                | 39 (4.7)       | 3 (3.2)           | 36 (4.9)                  |        | 3 (5.7)           | 36 (4.6)                  |        |
| Heterosexual, lesbian, other, or don't know **       | 11 (1.3)       | 2 (2.1)           | 9 (1.2)                   |        | 1 (1.9)           | 10 (1.3)                  |        |
| <b>Years of school</b> □□                            |                |                   |                           | 0.03   |                   |                           | 0.23   |
| ≤ 12                                                 | 96 (11.5)      | 14 (14.7)         | 82 (11.1)                 |        | 8 (15.1)          | 88 (11.3)                 |        |
| 13-15                                                | 186 (22.4)     | 30 (31.6)         | 156 (21.2)                |        | 14 (26.4)         | 172 (22.1)                |        |
| 16                                                   | 188 (22.6)     | 17 (17.9)         | 171 (23.2)                |        | 11 (20.8)         | 177 (22.7)                |        |
| >16                                                  | 362 (43.5)     | 34 (35.8)         | 328 (44.5)                |        | 20 (37.7)         | 342 (43.9)                |        |
| <b>Marital status</b>                                |                |                   |                           | 0.05   |                   |                           | 0.14   |
| Single no steady partner                             | 365 (44.1)     | 38 (40.9)         | 327 (44.6)                |        | 23 (43.4)         | 342 (44.2)                |        |
| Married                                              | 155 (18.7)     | 14 (15.1)         | 141 (19.2)                |        | 5 (9.4)           | 150 (19.4)                |        |

|                                                                       |            |           |            |        |           |            |                   |
|-----------------------------------------------------------------------|------------|-----------|------------|--------|-----------|------------|-------------------|
| Single with steady partner(s)                                         | 146 (17.7) | 15 (16.1) | 131 (17.9) |        | 12 (22.6) | 134 (17.3) |                   |
| Cohabiting                                                            | 105 (12.7) | 13 (14.0) | 92 (12.5)  |        | 6 (11.3)  | 99 (12.8)  |                   |
| Widowed, divorced, or separated                                       | 56 (6.8)   | 13 (14.0) | 43 (5.9)   |        | 7 (13.2)  | 49 (6.3)   |                   |
| <b>Any anal canal abnormality detected at visit</b>                   |            |           |            | 0.31   |           |            | 0.02              |
| No                                                                    | 725 (86.5) | 79 (83.2) | 646 (86.9) |        | 40 (75.5) | 685 (87.3) |                   |
| Yes                                                                   | 113 (13.5) | 16 (16.8) | 97 (13.1)  |        | 13 (24.5) | 100 (12.7) |                   |
| <b>Anal condyloma detected at visit<sup>†</sup></b>                   |            |           |            | 0.17   |           |            | 0.04              |
| No                                                                    | 825 (98.5) | 92 (96.8) | 733 (98.7) |        | 50 (94.3) | 775 (98.7) |                   |
| Yes                                                                   | 13 (1.5)   | 3 (3.2)   | 10 (1.3)   |        | 3 (5.7)   | 10 (1.3)   |                   |
| <b>HIV diagnosis history</b>                                          |            |           |            | <0.001 |           |            | 0.99              |
| No                                                                    | 548 (66.1) | 42 (44.2) | 506 (68.9) |        | 35 (66.0) | 513 (66.1) |                   |
| Yes                                                                   | 281 (33.9) | 53 (55.8) | 228 (31.1) |        | 18 (34.0) | 263 (33.9) |                   |
| <b>Diabetes diagnosis history</b>                                     |            |           |            | <0.001 |           |            | 0.01 <sup>†</sup> |
| No                                                                    | 775 (92.5) | 77 (81.1) | 698 (93.9) |        | 44 (83.0) | 731 (93.1) |                   |
| Yes                                                                   | 63 (7.5)   | 18 (18.9) | 45 (6.1)   |        | 9 (17.0)  | 54 (6.9)   |                   |
| <b>Obesity diagnosis history</b>                                      |            |           |            | 0.002  |           |            | 0.61              |
| No                                                                    | 716 (85.4) | 71 (74.7) | 645 (86.8) |        | 44 (83.0) | 672 (85.6) |                   |
| Yes                                                                   | 122 (14.6) | 24 (25.3) | 98 (13.2)  |        | 9 (17.0)  | 113 (14.4) |                   |
| <b>Arthritis diagnosis history</b>                                    |            |           |            | <0.001 |           |            | 0.05              |
| No                                                                    | 748 (89.3) | 74 (77.9) | 674 (90.7) |        | 43 (81.1) | 705 (89.8) |                   |
| Yes                                                                   | 90 (10.7)  | 21 (22.1) | 69 (9.3)   |        | 10 (18.9) | 80 (10.2)  |                   |
| <b>Stroke diagnosis history<sup>†</sup></b>                           |            |           |            | 0.04   |           |            | 0.55              |
| No                                                                    | 826 (98.6) | 91 (95.8) | 735 (98.9) |        | 52 (98.1) | 774 (98.6) |                   |
| Yes                                                                   | 12 (1.4)   | 4 (4.2)   | 8 (1.1)    |        | 1 (1.9)   | 11 (1.4)   |                   |
| <b>Preferred position for anal intercourse</b>                        |            |           |            | 0.06   |           |            | 0.69              |
| Always/mostly insertive                                               | 198 (23.6) | 14 (14.7) | 184 (24.8) |        | 10 (18.9) | 188 (24.0) |                   |
| Versatile                                                             | 349 (41.7) | 40 (42.1) | 309 (41.6) |        | 23 (43.4) | 326 (41.5) |                   |
| Always/mostly receptive                                               | 291 (34.7) | 41 (43.2) | 250 (33.7) |        | 20 (37.7) | 271 (34.5) |                   |
| <b>Frequency of anal intercourse in the last 30 days<sup>□□</sup></b> |            |           |            | 0.30   |           |            | 0.02              |
| 0                                                                     | 294 (35.6) | 41 (43.6) | 253 (34.6) |        | 30 (56.6) | 264 (34.2) |                   |
| 1                                                                     | 117 (14.2) | 14 (14.9) | 103 (14.1) |        | 6 (11.3)  | 111 (14.4) |                   |
| 2-3                                                                   | 188 (22.8) | 12 (12.8) | 176 (24.0) |        | 6 (11.3)  | 182 (23.5) |                   |
| 1 per week                                                            | 122 (14.8) | 14 (14.9) | 108 (14.8) |        | 3 (5.7)   | 119 (15.4) |                   |
| > 1 per week                                                          | 105 (12.7) | 13 (13.8) | 92 (12.6)  |        | 8 (15.1)  | 97 (12.6)  |                   |
| <b>Last receptive anal intercourse<sup>†</sup></b>                    |            |           |            | 0.04   |           |            | 0.02              |
| Within last month                                                     | 364 (43.8) | 39 (41.1) | 325 (44.1) |        | 15 (28.3) | 349 (44.8) |                   |

|                                                                                                                                                                                                                                                                                                                                                                                                                                 |            |           |            |        |           |            |        |
|---------------------------------------------------------------------------------------------------------------------------------------------------------------------------------------------------------------------------------------------------------------------------------------------------------------------------------------------------------------------------------------------------------------------------------|------------|-----------|------------|--------|-----------|------------|--------|
| > 1 month                                                                                                                                                                                                                                                                                                                                                                                                                       | 394 (47.4) | 45 (47.4) | 349 (47.4) |        | 34 (64.2) | 360 (46.2) |        |
| Never                                                                                                                                                                                                                                                                                                                                                                                                                           | 33 (4.0)   | 1 (1.1)   | 32 (4.3)   |        | 0         | 33 (4.2)   |        |
| Don't know                                                                                                                                                                                                                                                                                                                                                                                                                      | 41 (4.9)   | 10 (10.5) | 31 (4.2)   |        | 4 (7.6)   | 37 (4.8)   |        |
| <b>Clinician type</b>                                                                                                                                                                                                                                                                                                                                                                                                           |            |           |            | <0.001 |           |            | <0.001 |
| Medical doctor                                                                                                                                                                                                                                                                                                                                                                                                                  | 331 (39.5) | 12 (12.6) | 319 (42.9) |        | 8 (15.1)  | 323 (41.2) |        |
| Advanced practice nurse                                                                                                                                                                                                                                                                                                                                                                                                         | 442 (52.7) | 69 (72.6) | 373 (50.2) |        | 25 (47.2) | 417 (53.1) |        |
| Registered nurse                                                                                                                                                                                                                                                                                                                                                                                                                | 65 (7.8)   | 14 (14.7) | 51 (6.9)   |        | 20 (37.7) | 45 (5.7)   |        |
| Data are n (%). Missing: Waist size n = 7; gender identity n = 1; race and ethnicity n = 5; sexual orientation n = 2; years of school n = 6; marital n = 11; HIV diagnosis history n = 9; frequency of anal intercourse in the last 30 days n = 12; last receptive anal intercourse n = 6. Abbreviations: SD, standard deviation; IQR, interquartile range. All hypothesis tests are Pearson chi square unless otherwise noted. |            |           |            |        |           |            |        |
| * Student's <i>t</i> -test                                                                                                                                                                                                                                                                                                                                                                                                      |            |           |            |        |           |            |        |
| † Fisher's Exact Test                                                                                                                                                                                                                                                                                                                                                                                                           |            |           |            |        |           |            |        |
| ‡ Other includes Native Hawaiian or Pacific Islander, American Indian or Alaskan Native, and Other.                                                                                                                                                                                                                                                                                                                             |            |           |            |        |           |            |        |
| ** Individuals' self-reported sexual orientation included "heterosexual" (n=1) and "lesbian" (n=2) although self-reported sexual behavior satisfied inclusion criteria.                                                                                                                                                                                                                                                         |            |           |            |        |           |            |        |
| □□ Cochran-Armitage Test for Trend                                                                                                                                                                                                                                                                                                                                                                                              |            |           |            |        |           |            |        |

| <b>Table 2: Factors associated with sphincter resting and squeeze tone, Chicago, Houston, and Milwaukee, USA 2020-2022</b> |                          |                          |                          |                           |
|----------------------------------------------------------------------------------------------------------------------------|--------------------------|--------------------------|--------------------------|---------------------------|
|                                                                                                                            | <b>Resting tone</b>      |                          | <b>Squeeze tone</b>      |                           |
|                                                                                                                            | <b>OR (95% CI)</b>       | <b>aOR* (95% CI)</b>     | <b>OR (95% CI)</b>       | <b>aOR† (95% CI)</b>      |
| <b>Age, years</b>                                                                                                          | <b>1.08 (1.06-1.10)</b>  | <b>1.09 (1.06-1.11)</b>  | <b>1.07 (1.05-1.10)</b>  | <b>1.07 (1.04-1.09)</b>   |
| <b>Body mass index</b>                                                                                                     | <b>1.03 (1.00-1.06)</b>  | -                        | -                        | -                         |
| <b>Waist size, centimetres</b>                                                                                             |                          |                          |                          |                           |
| ≤ 102                                                                                                                      | 1.0                      |                          | 1.0                      | -                         |
| > 102                                                                                                                      | <b>2.54 (1.65-3.90)</b>  | -                        | <b>2.29 (1.31-3.99)</b>  | -                         |
| <b>Assigned sex at birth</b>                                                                                               |                          |                          |                          |                           |
| Male                                                                                                                       | 1.0                      | -                        | 1.0                      | 1.0                       |
| Female                                                                                                                     | <b>5.97 (1.86-19.15)</b> | -                        | <b>5.66 (1.53-20.93)</b> | <b>13.84 (3.19-60.05)</b> |
| <b>Gender identity</b>                                                                                                     |                          |                          |                          |                           |
| Man                                                                                                                        | 1.0                      | 1.0                      | -                        | -                         |
| Transgender woman, transgender man, woman, and other                                                                       | <b>3.76 (1.67-8.48)</b>  | <b>3.55 (1.11-11.38)</b> | -                        | -                         |
| Non-binary                                                                                                                 | 0.19 (0.01-3.36)         | 0.45 (0.02-9.04)         | -                        | -                         |
| <b>Race and ethnicity</b>                                                                                                  |                          |                          |                          |                           |
| White, non-Hispanic                                                                                                        | 1.0                      | 1.0                      | 1.0                      | -                         |
| Black, non-Hispanic                                                                                                        | 0.80 (0.46-1.40)         | 1.62 (0.82-3.22)         | 0.70 (0.35-1.43)         | -                         |
| Hispanic                                                                                                                   | 0.79 (0.45-1.38)         | 1.37 (0.71-2.63)         | <b>0.35 (0.14-0.88)</b>  | -                         |
| Asian, non-Hispanic                                                                                                        | 0.11 (0.01-1.92)         | 0.16 (0.01-3.67)         | 0.18 (0.01-3.15)         | -                         |
| Other, non-Hispanic <sup>□</sup>                                                                                           | 1.75 (0.51-6.07)         | <b>6.06 (1.37-26.83)</b> | 1.90 (0.46-7.88)         | -                         |
| <b>Years of school</b>                                                                                                     |                          |                          |                          |                           |
| ≤ 12                                                                                                                       | 1.0                      |                          | -                        | -                         |
| 13-15                                                                                                                      | 1.11 (0.56-2.20)         | -                        | -                        | -                         |
| 16                                                                                                                         | 0.58 (0.28-1.23)         | -                        | -                        | -                         |
| >16                                                                                                                        | 0.60 (0.31-1.16)         | -                        | -                        | -                         |
| <b>Marital status</b>                                                                                                      |                          |                          |                          |                           |
| Single no steady partner                                                                                                   | 1.0                      |                          | 1.0                      | 1.0                       |
| Married                                                                                                                    | 0.87 (0.46-1.65)         | -                        | 0.53 (0.21-1.38)         | <b>0.35 (0.13-0.94)</b>   |
| Single with steady partner(s)                                                                                              | 1.00 (0.54-1.87)         | -                        | 1.36 (0.66-2.77)         | 1.28 (0.57-2.87)          |
| Cohabiting                                                                                                                 | 1.24 (0.64-2.41)         | -                        | 0.95 (0.39-2.34)         | 0.75 (0.28-2.01)          |
| Widowed, divorced, or separated                                                                                            | <b>2.64 (1.31-5.32)</b>  | -                        | 2.21 (0.92-5.33)         | 1.01 (0.38-2.66)          |
| <b>Anal condyloma detected at visit</b>                                                                                    |                          |                          |                          |                           |
| No                                                                                                                         | -                        | -                        | 1.0                      | 1.0                       |
| Yes                                                                                                                        | -                        | -                        | <b>5.12 (1.41-18.55)</b> | <b>6.59 (1.42-30.59)</b>  |
| <b>HIV diagnosis history</b>                                                                                               |                          |                          |                          |                           |
| No                                                                                                                         | 1.0                      | 1.0                      | -                        | -                         |
| Yes                                                                                                                        | <b>2.79 (1.81-4.30)</b>  | <b>1.72 (1.01-2.92)</b>  | -                        | -                         |
| <b>Diabetes diagnosis history</b>                                                                                          |                          |                          |                          |                           |
| No                                                                                                                         | 1.0                      | -                        | 1.0                      | -                         |
| Yes                                                                                                                        | <b>3.66 (2.02-6.63)</b>  | -                        | <b>2.87 (1.34-6.11)</b>  | -                         |
| <b>Obesity diagnosis history</b>                                                                                           |                          |                          |                          |                           |
| No                                                                                                                         | 1.0                      | 1.0                      |                          | -                         |
| Yes                                                                                                                        | <b>2.25 (1.35-3.73)</b>  | <b>2.10 (1.17-3.79)</b>  |                          | -                         |
| <b>Arthritis diagnosis history</b>                                                                                         |                          |                          |                          |                           |
| No                                                                                                                         | 1.0                      | -                        | 1.0                      | -                         |
| Yes                                                                                                                        | <b>2.80 (1.63-4.82)</b>  | -                        | <b>2.12 (1.03-4.33)</b>  | -                         |
| <b>Stroke diagnosis history</b>                                                                                            |                          |                          |                          |                           |
| No                                                                                                                         | 1.0                      | -                        | -                        | -                         |
| Yes                                                                                                                        | <b>4.26 (1.27-14.26)</b> | -                        | -                        | -                         |
| <b>Preferred position for anal</b>                                                                                         |                          |                          |                          |                           |

|                                                                                                                                                                             |                          |                          |                           |                           |
|-----------------------------------------------------------------------------------------------------------------------------------------------------------------------------|--------------------------|--------------------------|---------------------------|---------------------------|
| <b>intercourse</b>                                                                                                                                                          |                          |                          |                           |                           |
| Always/mostly insertive                                                                                                                                                     | 1.0                      | 1.0                      | 1.0                       | -                         |
| Versatile                                                                                                                                                                   | 1.67 (0.89-3.12)         | 1.80 (0.89-3.66)         | 1.29 (0.61-2.74)          | -                         |
| Always/mostly receptive                                                                                                                                                     | <b>2.11 (1.12-2.95)</b>  | <b>2.82 (1.37-5.82)</b>  | 1.36 (0.63-2.92)          | -                         |
| <b>Frequency of anal intercourse in the last 30 days</b>                                                                                                                    |                          |                          |                           |                           |
| 0                                                                                                                                                                           | 1.0                      |                          | 1.0                       | -                         |
| 1                                                                                                                                                                           | 0.86 (0.45-1.63)         | -                        | 0.51 (0.21-1.22)          | -                         |
| 2-3                                                                                                                                                                         | <b>0.43 (0.22-0.84)</b>  | -                        | 0.31 (0.13-0.74)          | -                         |
| 1 per week                                                                                                                                                                  | 0.82 (0.43-1.55)         | -                        | <b>0.25 (0.08-0.79)</b>   | -                         |
| > 1 per week                                                                                                                                                                | 0.89 (0.46-1.73)         | -                        | 0.76 (0.34-1.68)          | -                         |
| <b>Clinician type</b>                                                                                                                                                       |                          |                          |                           |                           |
| Medical doctor                                                                                                                                                              | 1.0                      | 1.0                      | 1.0                       | 1.0                       |
| Advanced practice nurse                                                                                                                                                     | <b>4.76 (2.56-8.85)</b>  | <b>3.51 (1.77-6.94)</b>  | <b>2.32 (1.05-5.13)</b>   | 1.93 (0.87-4.32)          |
| Registered nurse                                                                                                                                                            | <b>7.20 (3.18-16.27)</b> | <b>5.91 (2.38-14.69)</b> | <b>17.15 (7.25-40.55)</b> | <b>11.79 (4.71-29.52)</b> |
| Before rounding to two decimals, bolded point estimates and 95% CI did not include unity. Abbreviations: OR, odds ratio; aOR, adjusted odds ratio; CI, confidence interval. |                          |                          |                           |                           |
| * Adjusted by variables retained in model and potential confounder assigned sex at birth.                                                                                   |                          |                          |                           |                           |
| † Adjusted by variables retained in model and potential confounder race and ethnicity.                                                                                      |                          |                          |                           |                           |
| □ Other includes Native Hawaiian or Pacific Islander, American Indian or Alaskan Native, and other.                                                                         |                          |                          |                           |                           |

412

413



414

|                         | <b>Resting tone accuracy (95% CI)</b> | <b>Squeeze tone accuracy (95% CI)</b> |
|-------------------------|---------------------------------------|---------------------------------------|
| <b>Overall</b>          | 0.53 (0.51-0.55)                      | 0.51 (0.49-0.53)                      |
| <b>Clinician type</b>   |                                       |                                       |
| Medical doctor          | 0.52 (0.51-0.54)                      | 0.52 (0.51-0.53)                      |
| Advanced practice nurse | 0.53 (0.50-0.57)                      | 0.51 (0.49-0.53)                      |
| Registered nurse        | 0.53 (0.43-0.64)                      | 0.52 (0.39-0.65)                      |

Abbreviation: AUC, area under the curve.

\* Any receptive anal intercourse defined as a preferred position for anal intercourse that is either versatile or always/mostly receptive anal sex.

415

**Figure. The proportion of individuals with decreased sphincter resting and squeeze tone by age and preferred position for anal intercourse in the Prevent Anal Cancer Studies, Chicago, Houston, and Milwaukee, USA, 2020-2022. The Cochran-Armitage test for trend p-value is <0.01 for each histogram.**

416

417  
418  
419  
420  
421  
422  
  
423  
424  
425  
  
426  
427  
  
428  
429  
  
430  
431  
  
432  
433  
  
434  
435  
436  
  
437  
438  
  
439  
440  
441  
  
442  
443  
444  
  
445  
446  
  
447  
448  
  
449  
450  
451  
  
452  
453  
454

## References

1. Human Rights Committee of the United Nations. In dialogue with Egypt, experts of the Human Rights Committee commend measures combatting discrimination, raise issues concerning treatment of lesbian, gay, bisexual, transgender and intersex persons and judicial independence. Geneva, Switzerland: UN Geneva, United Nations, 2023.
2. Cichowitz C, Rubenstein L, Beyrer C. Forced anal examinations to ascertain sexual orientation and sexual behavior: An abusive and medically unsound practice. *PLoS Med* 2018;15:e1002536. doi: 10.1371/journal.pmed.1002536 [published Online First: 2018/03/17]
3. International Forensic Expert Group. Statement on Anal Examinations in Cases of Alleged Homosexuality. *Torture* 2016;26:85-91. [published Online First: 2016/11/20]
4. Tardieu A. Étude Médico-légale sur les attentats aux moeurs. 5th ed. Paris: J.B. Ballière et fils 1867:197-210.
5. Tamagne F. Histoire de l'homosexualité: Berlin, Londres, Paris 1919-1939. (Paris: Éditions du Seuil 2000) ed: Seuil 2000:232-33.
6. Ross AI. Public City, Public Sex: Homosexuality, Prostitution, and Urban Culture in Nineteenth-Century Paris. Philadelphia: Temple University Press 2019:99-114.
7. Houbre G. "The Bastard Offspring of Hermes and Aphrodite: Sexual "Anomalies" and Medical Curiosity in France,". In: Cryle P, Forth, C., ed. Sexuality at the fin-de-siecle: The Makings of a "Central Problem". Delaware: Newark University of Delaware Press 2008:62-63.
8. Long S. When Doctors Torture: The Anus and the State in Egypt and Beyond. *Health Hum Rights* 2004;7:114-40.
9. Singh J, Boopathi E, Addya S, et al. Aging-associated changes in microRNA expression profile of internal anal sphincter smooth muscle: Role of microRNA-133a. *Am J Physiol Gastrointest Liver Physiol* 2016;311:G964-g73. doi: 10.1152/ajpgi.00290.2016 [published Online First: 20160915]
10. Rajasekaran MR, Kanoo S, Fu J, et al. Age-related external anal sphincter muscle dysfunction and fibrosis: possible role of Wnt/ $\beta$ -catenin signaling pathways. *Am J Physiol Gastrointest Liver Physiol* 2017;313:G581-G88. doi: 10.1152/ajpgi.00209.2017
11. Miles AJ, Allen-Mersh TG, Wastell C. Effect of anoreceptive intercourse on anorectal function. *J R Soc Med* 1993;86:144-7. doi: 10.1177/014107689308600309
12. Chun AB, Rose S, Mitrani C, et al. Anal sphincter structure and function in homosexual males engaging in anoreceptive intercourse. *Am J Gastroenterol* 1997;92:465-8.
13. Hillman RJ, Berry-Lawhorn JM, Ong JJ, et al. International Anal Neoplasia Society guidelines for the practice of digital anal rectal examination. *J Low Genit Tract Dis* 2019;23:138-46. doi: 10.1097/lgt.0000000000000458 [published Online First: 2019/03/21]
14. Nyitray AG, Nitkowski J, McAuliffe TL, et al. Home-based self-sampling vs clinician sampling for anal precancer screening: The Prevent Anal Cancer Self-Swab Study. *Int J Cancer* 2023;153:843-53. doi: 10.1002/ijc.34553 [published Online First: 20230509]

- 455 15. Flores RA, Wilkerson JM, Travis A, et al. Men who have sex with men experience low anxiety and  
456 few barriers to performing anal self or companion examinations: a qualitative study of the Prevent  
457 Anal Cancer Palpation Study. *Cult Health Sex* 2023;1-16. doi: 10.1080/13691058.2023.2263500  
458 [published Online First: 20231009]
- 459 16. Orkin BA, Sinykin SB, Lloyd PC. The digital rectal examination scoring system (DRESS). *Dis Colon*  
460 *Rectum* 2010;53:1656-60. doi: 10.1007/DCR.0b013e3181f23c85 [published Online First:  
461 2010/12/24]
- 462 17. Hosmer DW, Jr., Lemeshow S, Sturdivant RX. Applied Logistic Regression. 3rd ed. New Jersey:  
463 Wiley & Sons 2013.
- 464 18. Rothman KJ, Greenland S, Lash TL, editors. *Modern Epidemiology*. 3rd ed. Philadelphia, PA:  
465 Lippincott Williams & Wilkins, 2008.
- 466 19. Firth D. Bias reduction of maximum likelihood estimates. *Biometrika* 1993;80:27-38.
- 467 20. Abe T, Kunimoto M, Hachiro Y, et al. Effects of Age and Sex on the Anorectal Sensory Threshold to  
468 Electrical Stimulation: A Single-center Observational Study. *J Anus Rectum Colon* 2023;7:74-81.  
469 doi: 10.23922/jarc.2022-063 [published Online First: 20230425]
- 470 21. Jameson JS, Chia YW, Kamm MA, et al. Effect of age, sex and parity on anorectal function. *Br J*  
471 *Surg* 1994;81:1689-92. doi: 10.1002/bjs.1800811143
- 472 22. Gundling F, Seidl H, Scalercio N, et al. Influence of gender and age on anorectal function: normal  
473 values from anorectal manometry in a large caucasian population. *Digestion* 2010;81:207-13. doi:  
474 10.1159/000258662 [published Online First: 20100121]
- 475 23. Mohanty I, Singh J, Rattan S. Downregulation of thromboxane A2 and angiotensin II type 1 receptors  
476 associated with aging-related decrease in internal anal sphincter tone. *Sci Rep* 2019;9:6759. doi:  
477 10.1038/s41598-019-42894-4 [published Online First: 20190501]
- 478 24. Mahdy MAA. Skeletal muscle fibrosis: an overview. *Cell Tissue Res* 2019;375:575-88. doi:  
479 10.1007/s00441-018-2955-2 [published Online First: 20181112]
- 480 25. Lunniss PJ, Gladman MA, Hetzer FH, et al. Risk factors in acquired faecal incontinence. *J R Soc Med*  
481 2004;97:111-6. doi: 10.1177/014107680409700303
- 482 26. Ellington DR, Polin MR, Szychowski JM, et al. The effect of obesity on fecal incontinence symptom  
483 distress, quality of life, and diagnostic testing measures in women. *Int Urogynecol J*  
484 2013;24:1733-8. doi: 10.1007/s00192-013-2103-1 [published Online First: 20130504]
- 485 27. Grabski B, Kasperek K. Sexual Anal Pain in Gay and Bisexual Men: In Search of Explanatory  
486 Factors. *J Sex Med* 2020;17:716-30. doi: 10.1016/j.jsxm.2020.01.020 [published Online First:  
487 20200228]
- 488 28. Vansintejan J, Vandevoorde J, Devroey D. The GAY MEn Sex StudieS: Anodyspareunia Among  
489 Belgian Gay Men. *Sex Med* 2013;1:87-94. doi: 10.1002/sm2.6

- 490 29. Haser GC, Sumpio B. Systemic and cell-specific mechanisms of vasculopathy induced by human  
491 immunodeficiency virus and highly active antiretroviral therapy. *J Vasc Surg* 2017;65:849-59.  
492 doi: 10.1016/j.jvs.2016.01.036 [published Online First: 20160316]
- 493 30. Després JP. Health consequences of visceral obesity. *Ann Med* 2001;33:534-41. doi:  
494 10.3109/07853890108995963  
495

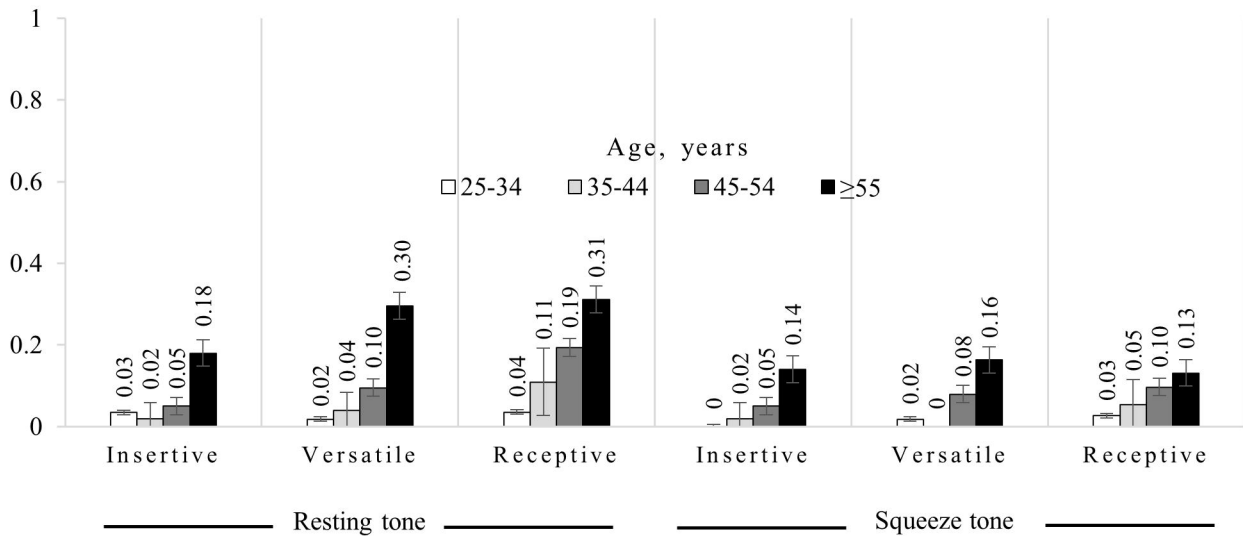

Source: https://medrxiv.org/content/10.1101/2024.01.31.24302098v1.full.pdf
